# Supplementary material
Source: PubMed Central journal article supplement (PMC4448141)
Supplement: NIHMS691009-supplement-Supplement.pdf [file NIHMS691009-supplement-Supplement.pdf]

## SUPPLEMENTARY DATA

### **Increasing Fragmentation of Disulfide-Bonded Proteins for Top-Down Mass Spectrometry by Supercharging**

Jiang Zhang<sup>1</sup>, Rachel R. Ogorzalek Loo<sup>2,3</sup>, and Joseph A. Loo<sup>1,2,3,\*</sup>

<sup>1</sup>Department of Chemistry and Biochemistry, University of California-Los Angeles, Los Angeles, California, 90095, United States

<sup>2</sup>Department of Biological Chemistry, David Geffen School of Medicine at UCLA, University of California-Los Angeles, Los Angeles, California, 90095, United States

<sup>3</sup>UCLA/DOE Institute for Genomics and Proteomics, University of California-Los Angeles, Los Angeles, California, 90095, United States

\* Corresponding author. Tel.: +1 310 794 7023; fax: +1 310 206 4038.  
E-mail address: JLoo@chem.ucla.edu (J.A. Loo).

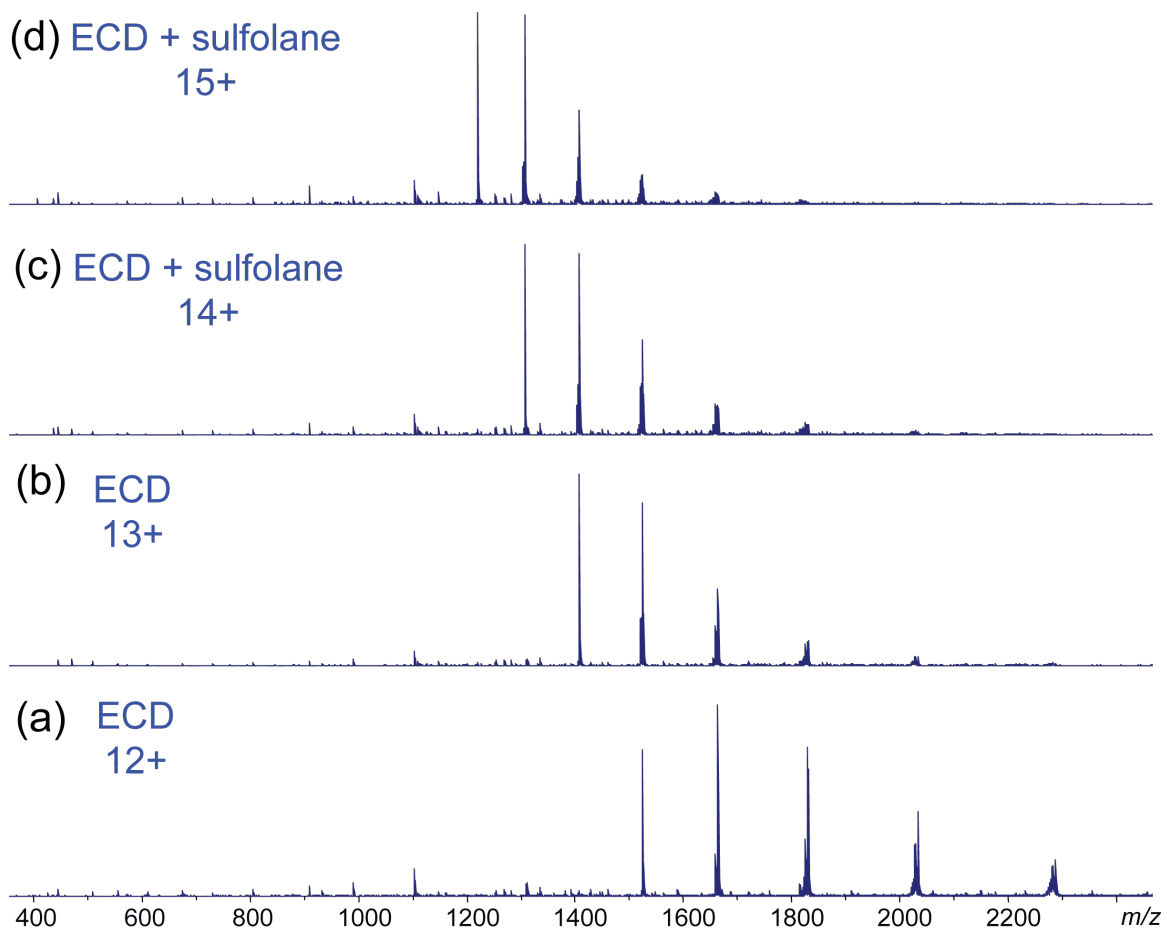

**Figure S1.** ECD mass spectra of  $\beta$ -lactoglobulin (0.5  $\mu$ M) in (a-b) 50:50:0.1 ACN: H<sub>2</sub>O: FA and (c-d) with 150 mM sulfolane.

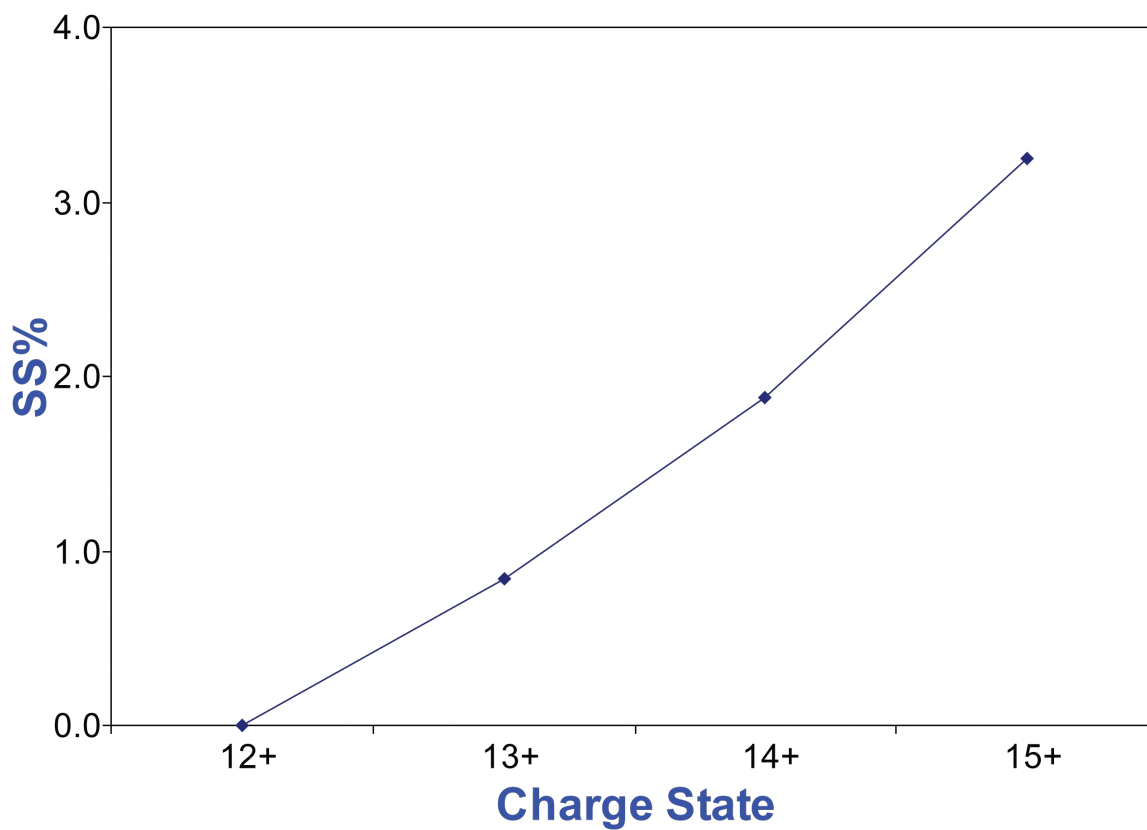

**Figure S2.** Relative fraction of product ions showing disulfide bond cleavage as a function of precursor charge for ECD of  $\beta$ -lactoglobulin.

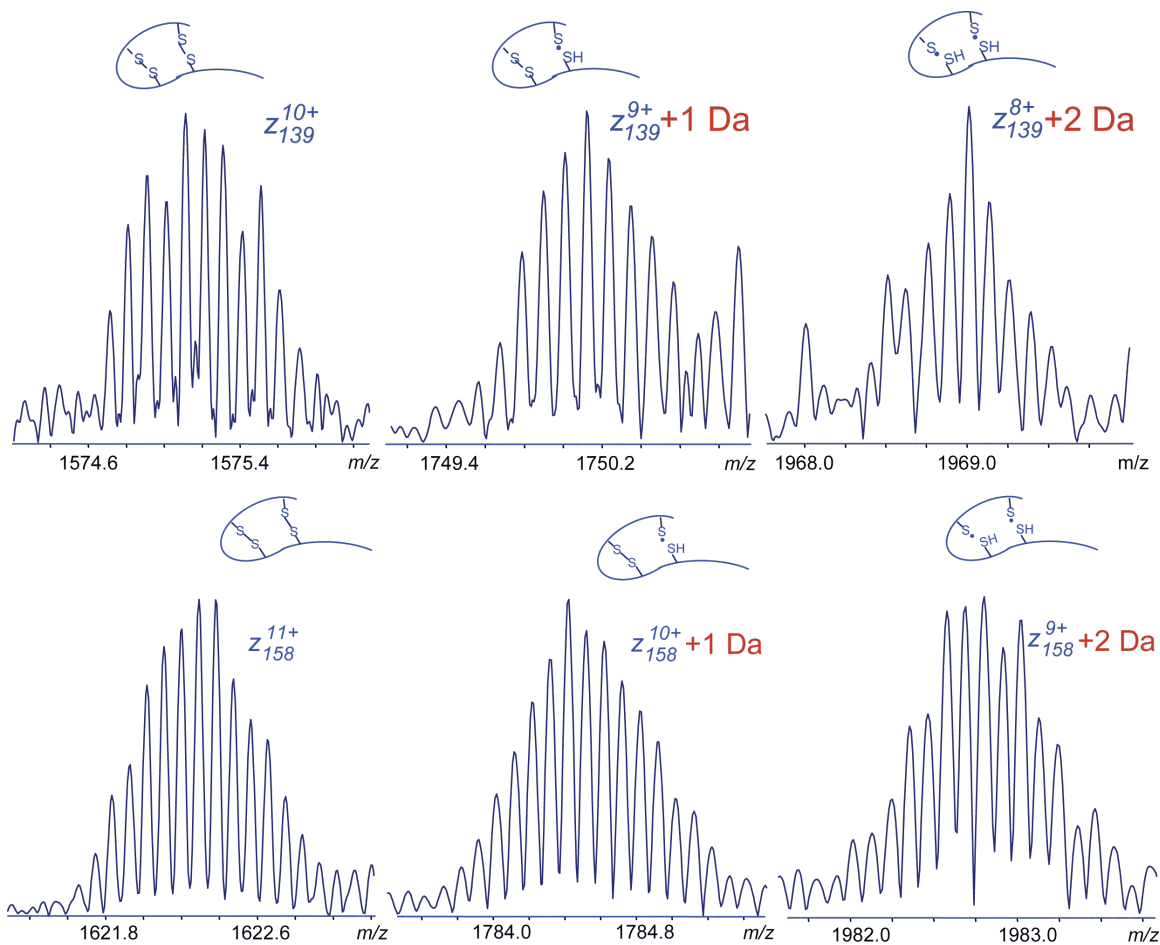

**Figure S3.** ECD product ions of  $\beta$ -lactoglobulin (bovine) containing potential disulfide cleavage by hydrogen radical capture, while the protein backbone inside the disulfide bond remain intact.



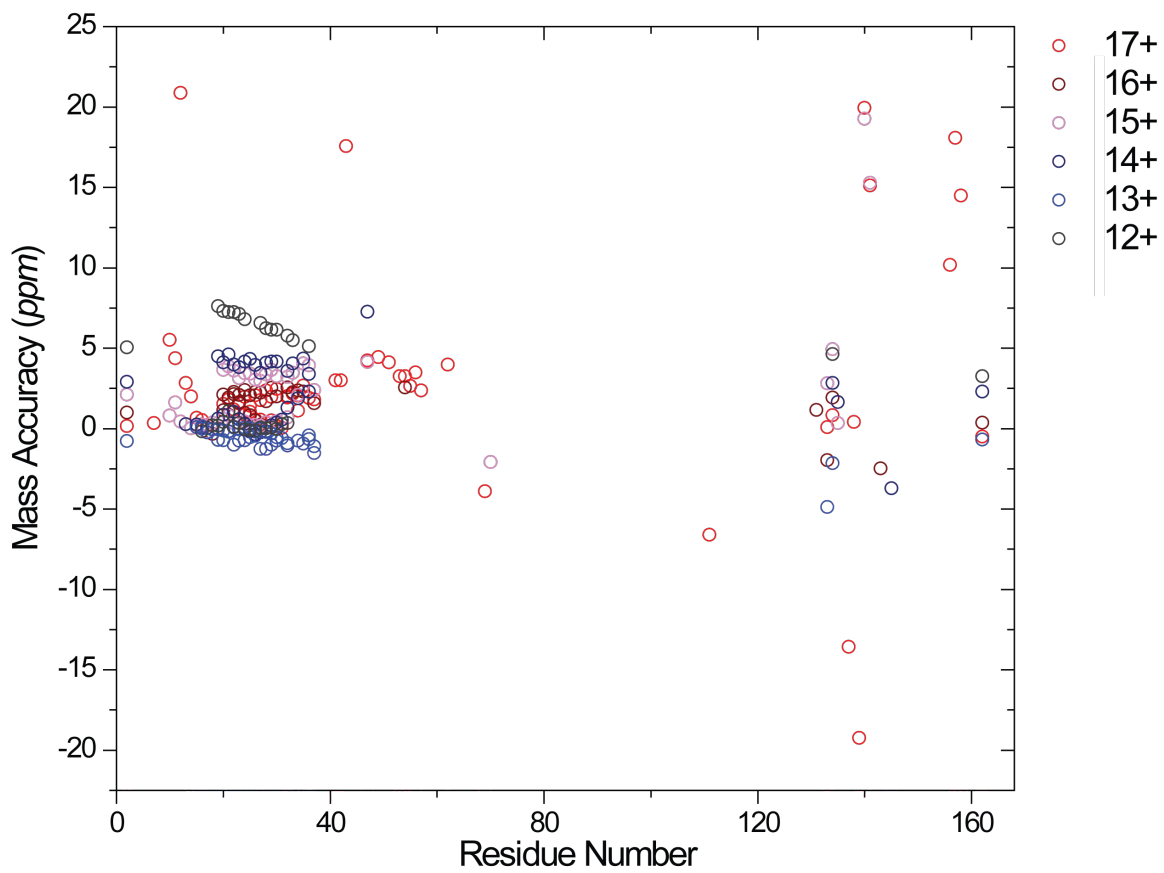

**Figure S4.** Mass accuracy of CAD-derived product ions of  $\beta$ -lactoglobulin for the 15+-17+ charge states (with sulfolane) and 12+-14+ charge states (without sulfolane).

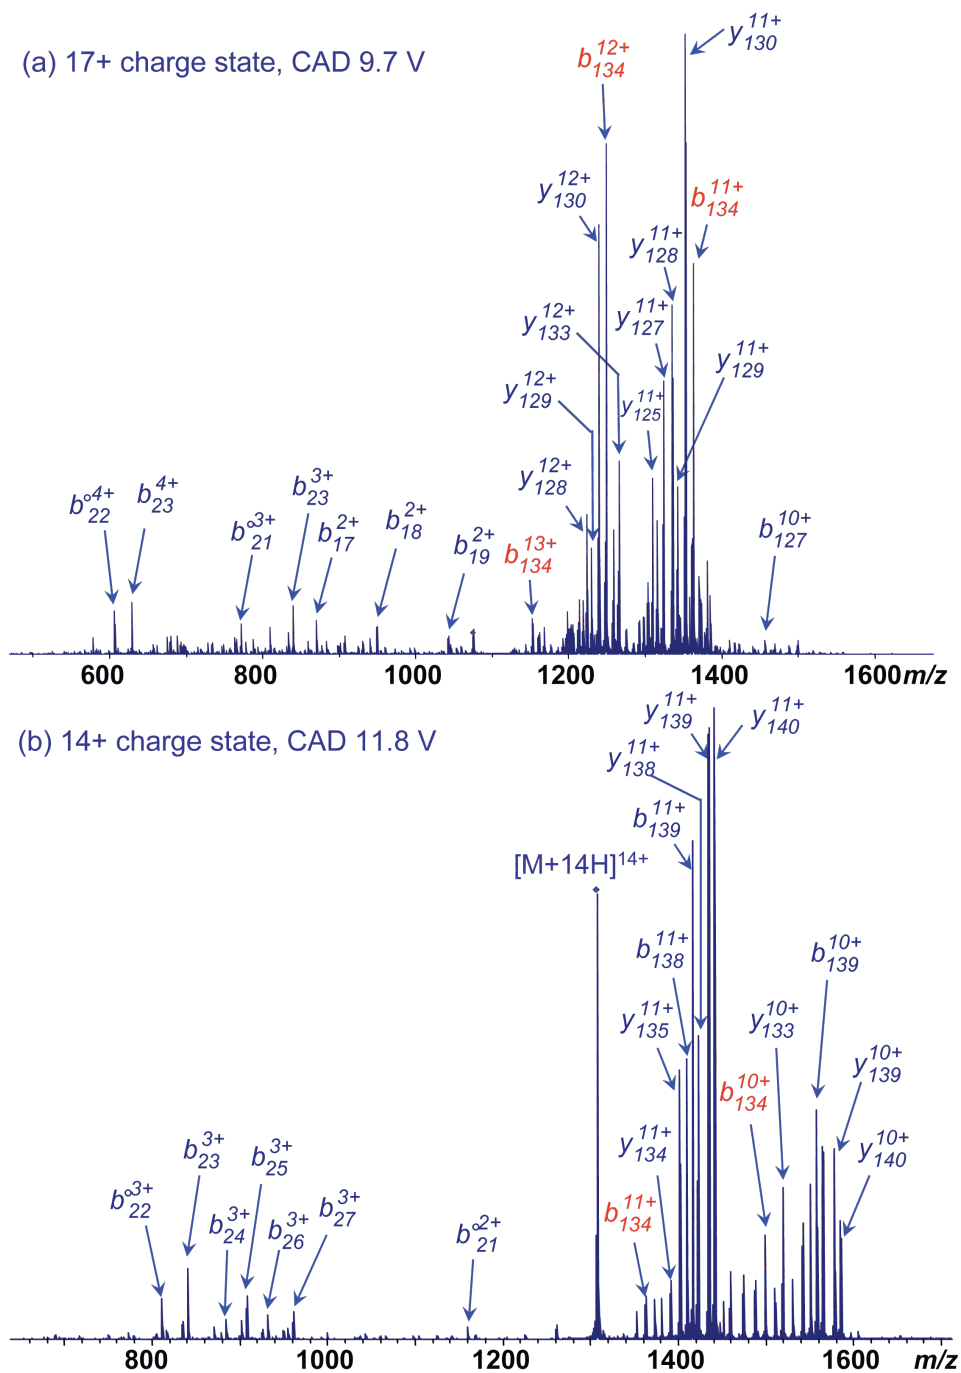

**Figure S5.** CAD mass spectra of  $\beta$ -lactoglobulin (bovine) (0.5  $\mu$ M) for the (a) 17+ and (b) 14+ precursors. High abundance product ions with disulfide cleavages are labeled in red.

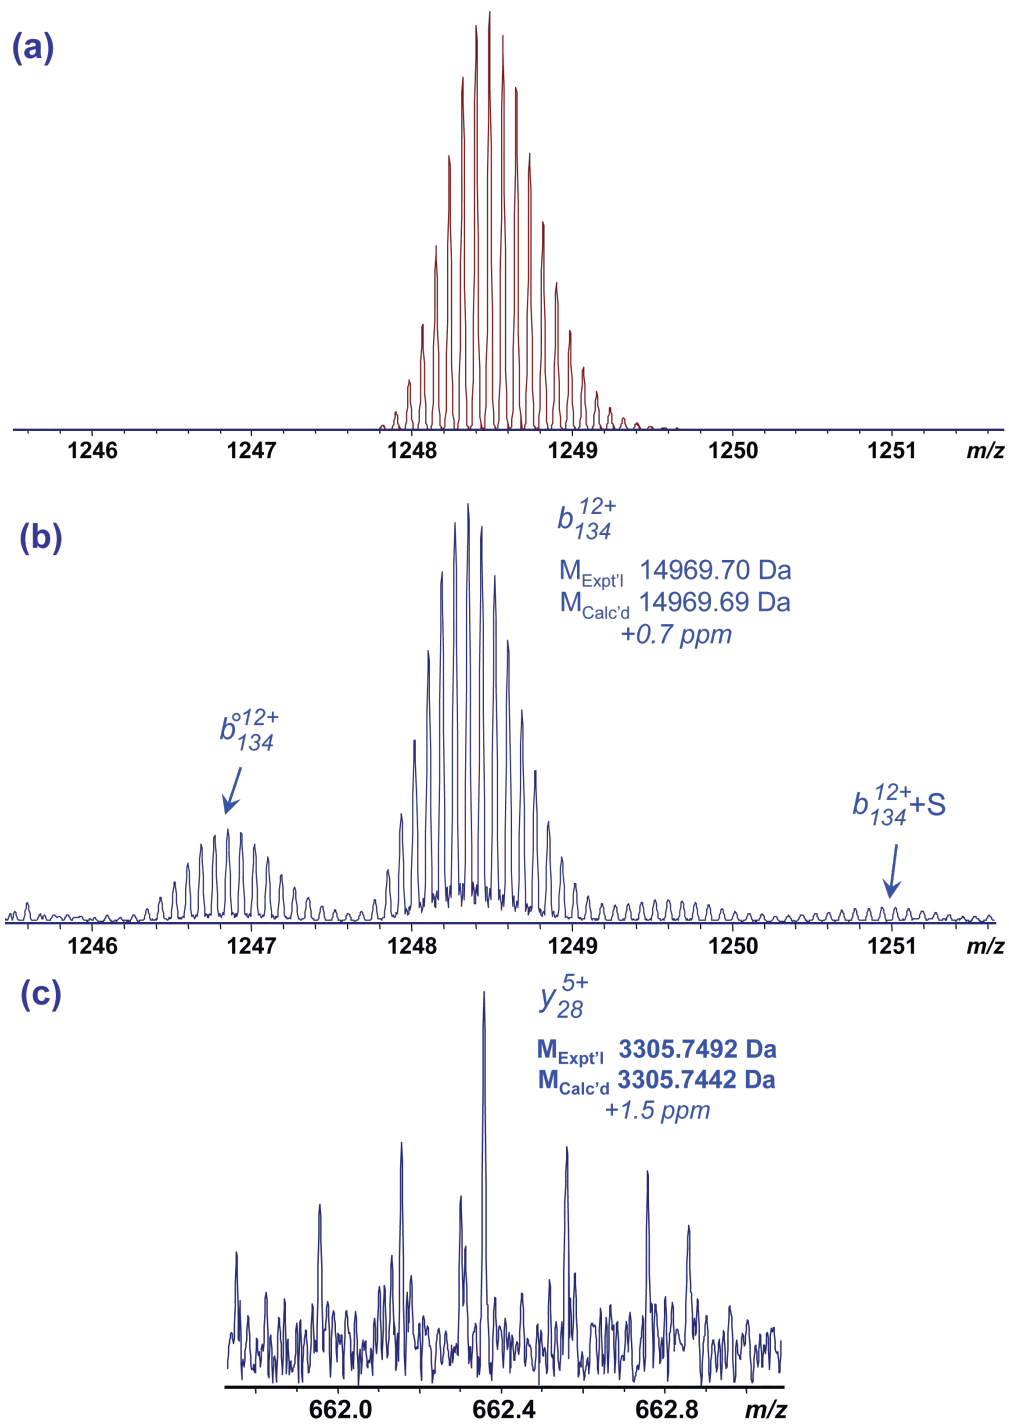

**Figure S6.** CAD mass spectra of  $\beta$ -lactoglobulin product ions with disulfide bond cleavage: (a) theoretical isotopic calculation of  $b_{134}$ , (b) experimental data for charge state 17+, (c) complementary  $y_{28}$  ion. The circle sign in superscript denotes water loss.

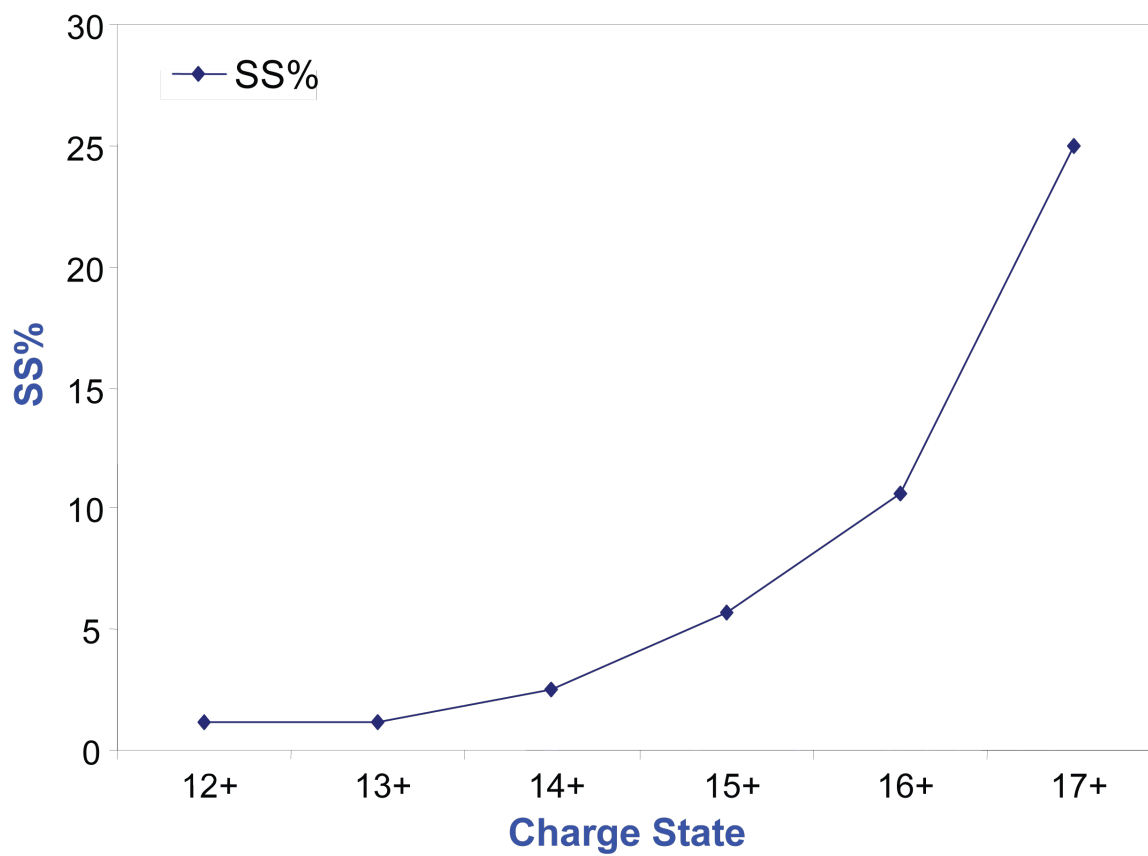

**Figure S7.** Relative fraction of product ions showing disulfide bond cleavage as a function of precursor charge for CAD of  $\beta$ -lactoglobulin.

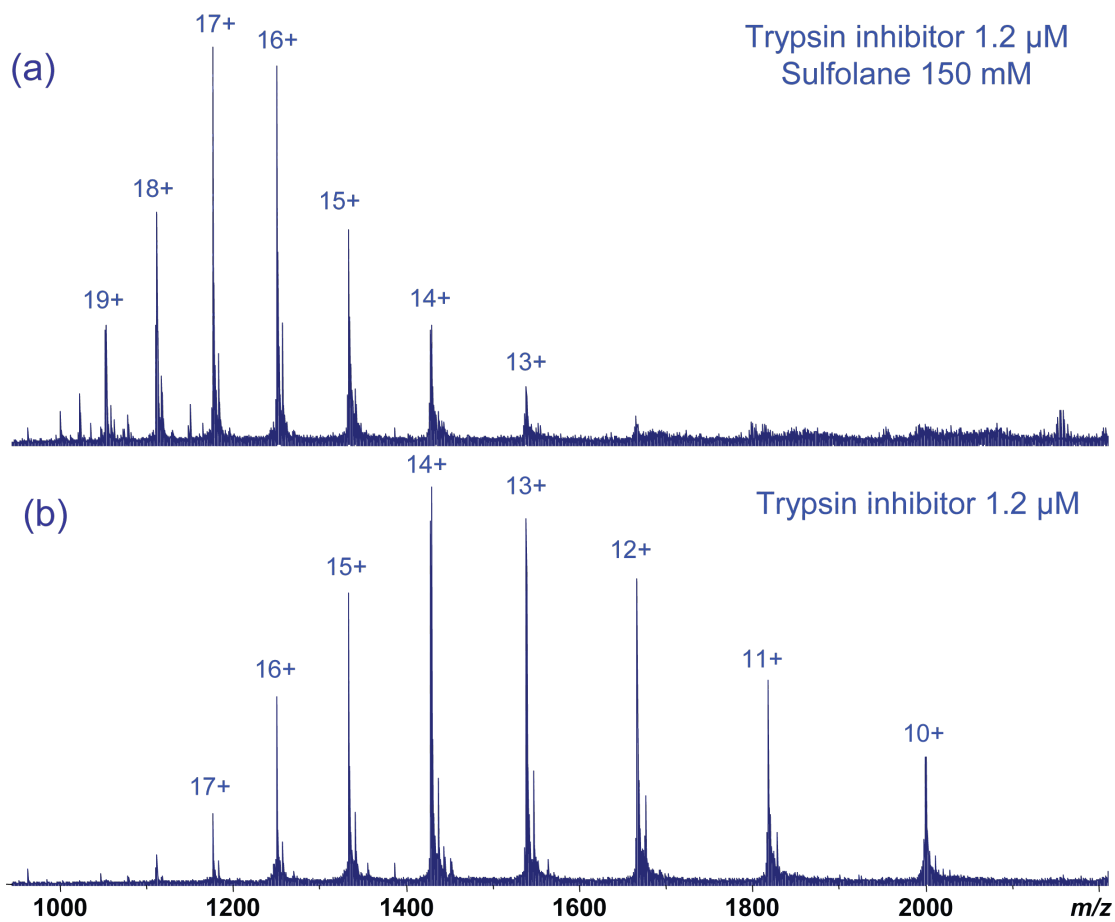

**Figure S8.** ESI mass spectra of trypsin inhibitor (soybean) (1.2  $\mu\text{M}$ ) in (a) 150 mM sulfolane in 50:50:0.1 ACN: H<sub>2</sub>O: FA and (b) without sulfolane.

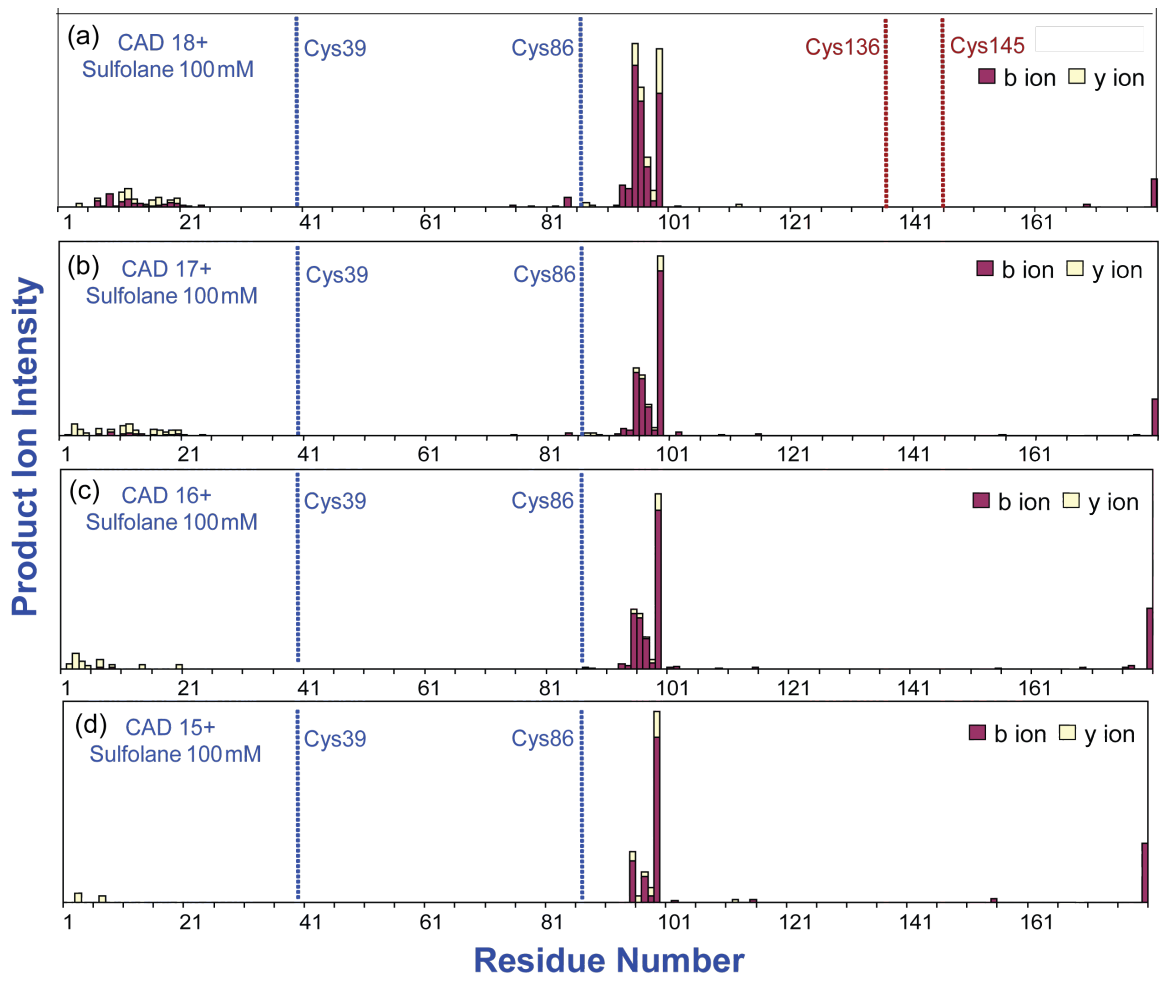

Figure S9. CAD product ion map of trypsin inhibitor (soybean) in 100 mM sulfolane.

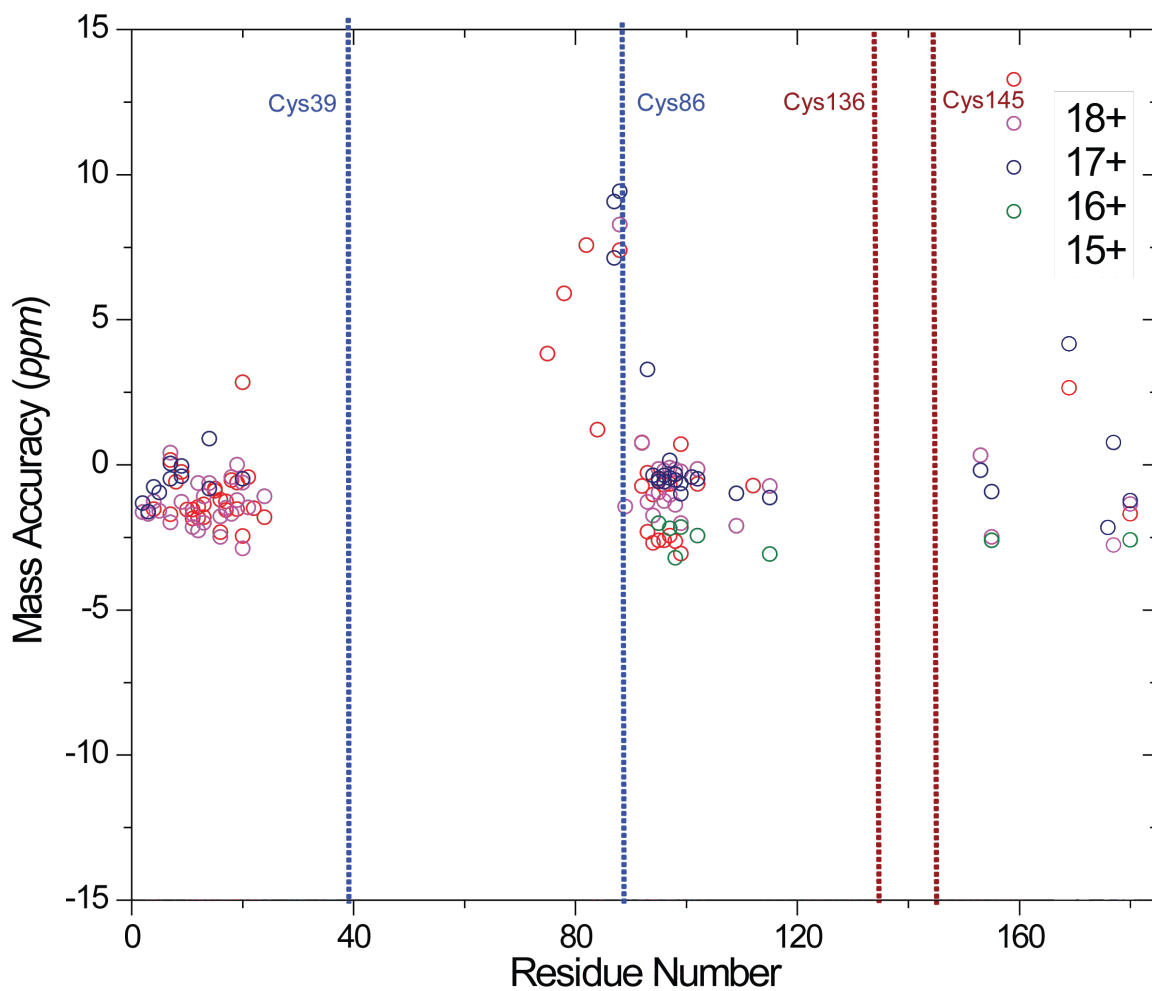

**Figure S10.** Mass accuracy of CAD-derived product ions of trypsin inhibitor for the 15+-18+ charge states. Product ions corresponding to disulfide bond cleavage Cys39-Cys86 were observed.

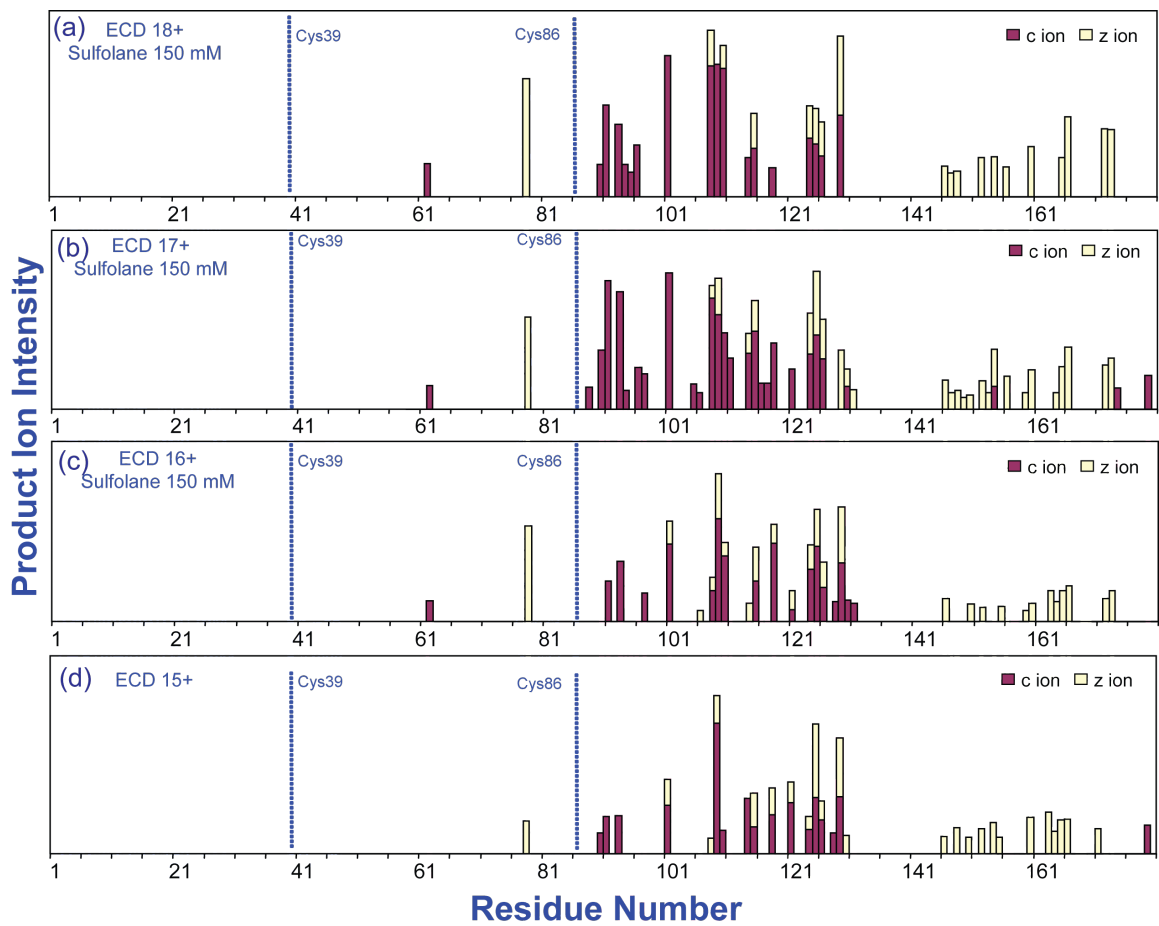

**Figure S11.** ECD product ion map of trypsin inhibitor (soybean) for charge states (a) 18+, (b) 17+ and (c) 16+ under supercharging conditions, and (d) 15+ without sulfolane.



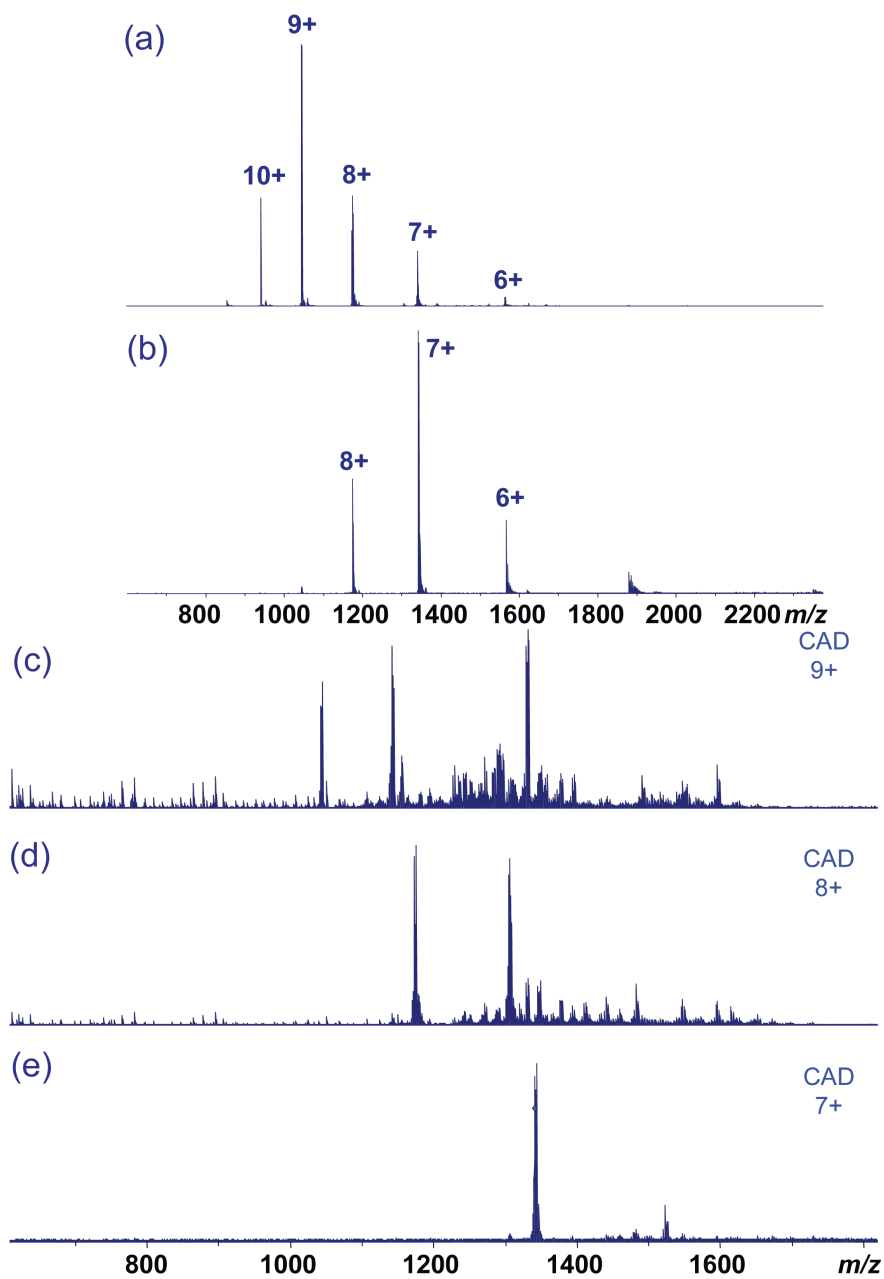

**Figure S12.** ESI mass spectrum of human proinsulin (a) with 150 mM sulfolane, and (b) without sulfolane. CAD mass spectra for charge states (c) 9+ and (d) 8+ with sulfolane, and (e) 7+ without sulfolane are shown.

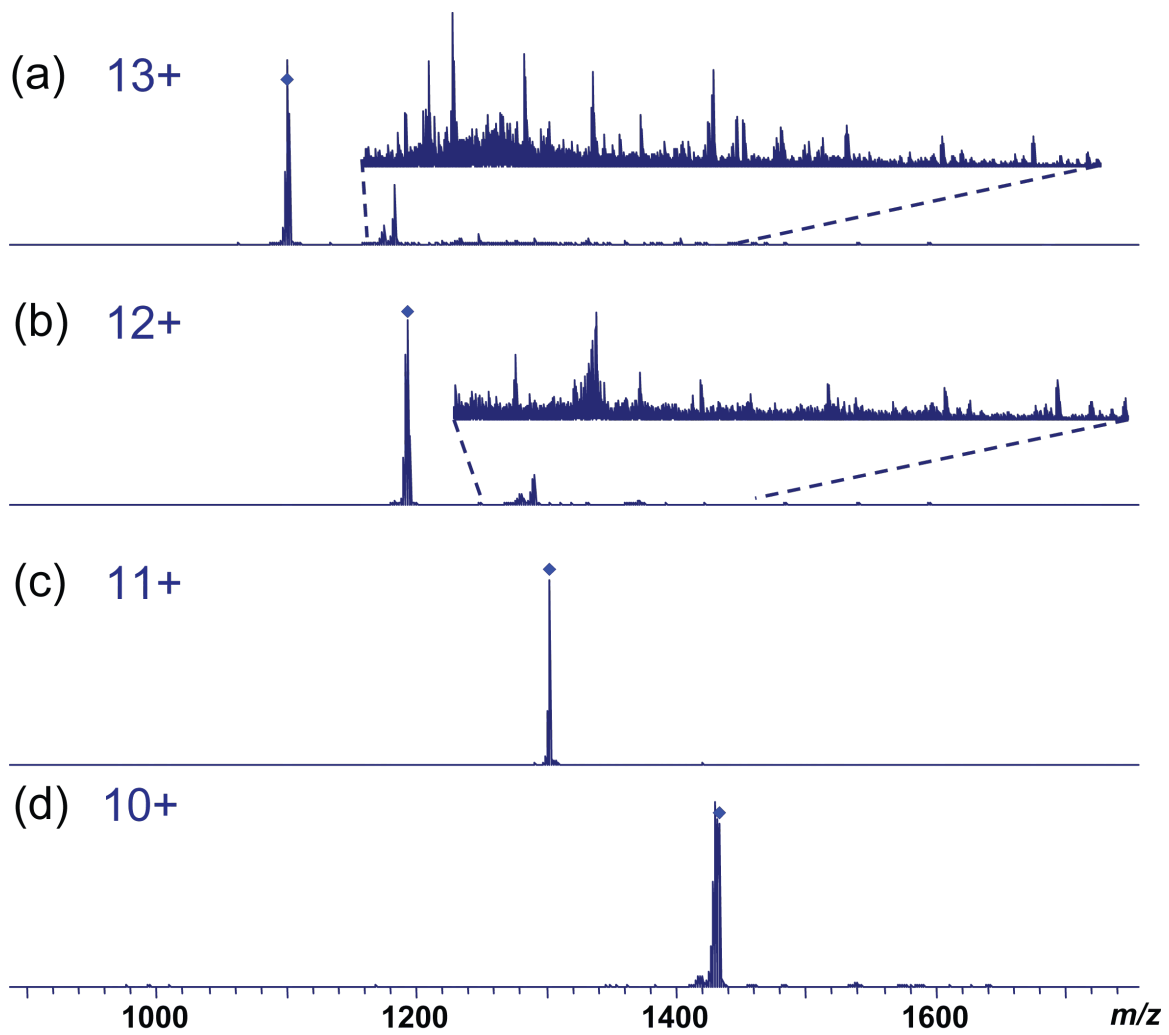

**Figure S13.** CAD mass spectra of chicken lysozyme for supercharged (a) 13+ and (b) 12+ precursors, and (c) 11+ and (d) 10+ precursors without sulfolane added.

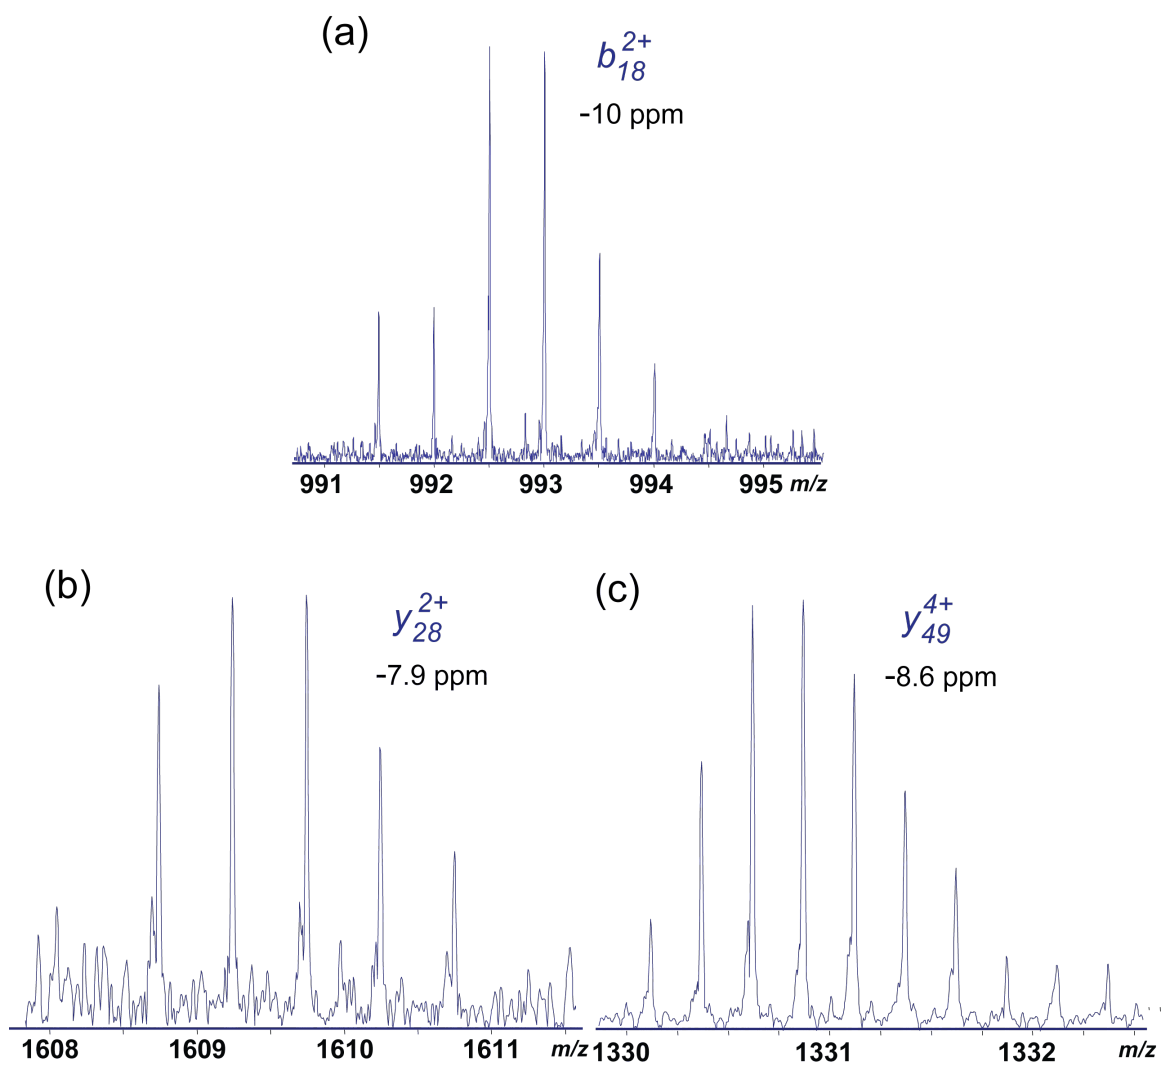

**Figure S14.** CAD product ions of chicken lysozyme: (a)  $b_{18}^{2+}$ , one disulfide bond cleavage; (b)  $y_{28}^{2+}$ , two disulfide bond cleavages; (c)  $y_{49}^{4+}$ , three disulfide bond cleavages.
